# Supplementary material for: Method for Essential Protein Prediction Based on a Novel Weighted Protein-Domain Interaction Network
Source: Front Genet. 2021 Mar 17;12:645932. doi: 10.3389/fgene.2021.645932 (PMC8010314; doi:10.3389/fgene.2021.645932)
Supplement: Supplementary file 5 [file Table_5.XLS]

## Sheet: Sheet1
Q0045'	PF00115'
Q0050'	PF00078'
Q0050'	PF01348'
Q0055'	PF00078'
Q0055'	PF00115'
Q0055'	PF01348'
Q0060'	PF00115'
Q0060'	PF00961'
Q0065'	PF00115'
Q0065'	PF00961'
Q0070'	PF00115'
Q0070'	PF03161'
Q0075'	PF00961'
Q0105'	PF13631'
Q0110'	PF03161'
Q0110'	PF13631'
Q0115'	PF00961'
Q0115'	PF13631'
Q0120'	PF00961'
Q0120'	PF13631'
Q0130'	PF00137'
Q0160'	PF03161'
Q0255'	PF00961'
YAL004W'	PF10712'
YAL005C'	PF00012'
YAL007C'	PF01105'
YAL012W'	PF01053'
YAL013W'	PF08598'
YAL014C'	PF05739'
YAL015C'	PF00730'
YAL016W'	PF02985'
YAL017W'	PF00069'
YAL019W'	PF00176'
YAL019W'	PF00271'
YAL020C'	PF00415'
YAL021C'	PF03372'
YAL021C'	PF12799'
YAL023C'	PF02366'
YAL023C'	PF02815'
YAL024C'	PF00617'
YAL024C'	PF00618'
YAL026C'	PF00122'
YAL026C'	PF12710'
YAL028W'	PF13694'
YAL029C'	PF00063'
YAL029C'	PF00612'
YAL029C'	PF01843'
YAL030W'	PF00957'
YAL034C'	PF04433'
YAL035W'	PF00009'
YAL035W'	PF03144'
YAL035W'	PF11987'
YAL036C'	PF01926'
YAL036C'	PF02824'
YAL038W'	PF00224'
YAL038W'	PF02887'
YAL039C'	PF01265'
YAL040C'	PF00134'
YAL041W'	PF00564'
YAL041W'	PF00621'
YAL042W'	PF07970'
YAL042W'	PF13850'
YAL044W-A'	PF01722'
YAL046C'	PF01722'
YAL049C'	PF01738'
YAL051W'	PF00172'
YAL053W'	PF06011'
YAL054C'	PF00501'
YAL054C'	PF11930'
YAL054C'	PF13193'
YAL056W'	PF13418'
YAL059W'	PF09135'
YAL060W'	PF00107'
YAL060W'	PF08240'
YAL061W'	PF00107'
YAL061W'	PF08240'
YAL062W'	PF00208'
YAL062W'	PF02812'
YAL063C'	PF00624'
YAL063C'	PF07691'
YAL063C'	PF13928'
YAL064C-A'	PF07691'
YAL067C'	PF07690'
YAL068C'	PF00660'
YAL068W-A'	PF04318'
YAR002C-A'	PF01105'
YAR003W'	PF00400'
YAR007C'	PF01336'
YAR008W'	PF01974'
YAR009C'	PF00665'
YAR009C'	PF07727'
YAR010C'	PF01021'
YAR014C'	PF00018'
YAR018C'	PF00069'
YAR019C'	PF00069'
YAR020C'	PF00660'
YAR023C'	PF00674'
YAR027W'	PF00674'
YAR028W'	PF00674'
YAR029W'	PF00674'
YAR031W'	PF00674'
YAR033W'	PF00674'
YAR035W'	PF00755'
YAR042W'	PF00023'
YAR042W'	PF00169'
YAR042W'	PF01237'
YAR050W'	PF00624'
YAR050W'	PF07691'
YAR071W'	PF00328'
YAR073W'	PF00478'
YAR073W'	PF00571'
YAR075W'	PF00478'
YBL002W'	PF00125'
YBL003C'	PF00125'
YBL005W'	PF00172'
YBL005W'	PF04082'
YBL005W-A'	PF01021'
YBL005W-B'	PF00665'
YBL005W-B'	PF01021'
YBL005W-B'	PF07727'
YBL007C'	PF00018'
YBL008W'	PF00400'
YBL008W'	PF07569'
YBL009W'	PF12330'
YBL011W'	PF01553'
YBL013W'	PF00551'
YBL016W'	PF00069'
YBL019W'	PF03372'
YBL021C'	PF00808'
YBL022C'	PF00004'
YBL023C'	PF00493'
YBL024W'	PF01189'
YBL026W'	PF01423'
YBL027W'	PF01280'
YBL030C'	PF00153'
YBL032W'	PF00013'
YBL035C'	PF04042'
YBL036C'	PF01168'
YBL037W'	PF01602'
YBL037W'	PF02883'
YBL038W'	PF00252'
YBL039C'	PF00117'
YBL039C'	PF06418'
YBL041W'	PF00227'
YBL042C'	PF02133'
YBL045C'	PF00675'
YBL045C'	PF05193'
YBL047C'	PF00627'
YBL047C'	PF12763'
YBL051C'	PF14259'
YBL052C'	PF01853'
YBL054W'	PF00249'
YBL055C'	PF01026'
YBL056W'	PF00481'
YBL058W'	PF00789'
YBL059C-A'	PF08583'
YBL060W'	PF01369'
YBL061C'	PF08238'
YBL063W'	PF00225'
YBL064C'	PF00578'
YBL064C'	PF10417'
YBL066C'	PF00172'
YBL066C'	PF04082'
YBL067C'	PF00443'
YBL068W'	PF00156'
YBL068W'	PF13793'
YBL068W-A'	PF13602'
YBL069W'	PF08240'
YBL069W'	PF13602'
YBL071W-A'	PF05207'
YBL072C'	PF01201'
YBL075C'	PF00012'
YBL076C'	PF00133'
YBL076C'	PF08264'
YBL079W'	PF03177'
YBL079W'	PF08801'
YBL084C'	PF00515'
YBL084C'	PF12895'
YBL084C'	PF13414'
YBL085W'	PF00018'
YBL085W'	PF00169'
YBL085W'	PF07647'
YBL087C'	PF00238'
YBL088C'	PF00454'
YBL088C'	PF02260'
YBL089W'	PF01490'
YBL091C'	PF00557'
YBL091C-A'	PF00635'
YBL098W'	PF01494'
YBL099W'	PF00006'
YBL099W'	PF00306'
YBL099W'	PF02874'
YBL100W-A'	PF01021'
YBL100W-B'	PF00665'
YBL100W-B'	PF01021'
YBL100W-B'	PF07727'
YBL100W-B'	PF13976'
YBL101C'	PF02752'
YBL102W'	PF04178'
YBL103C'	PF00010'
YBL105C'	PF00069'
YBL105C'	PF00168'
YBL105C'	PF00433'
YBL106C'	PF08596'
YBL111C'	PF00270'
YBL112C'	PF00271'
YBR001C'	PF01204'
YBR001C'	PF07492'
YBR002C'	PF01255'
YBR003W'	PF00348'
YBR005W'	PF12273'
YBR006W'	PF00171'
YBR007C'	PF08238'
YBR008C'	PF07690'
YBR009C'	PF00125'
YBR010W'	PF00125'
YBR011C'	PF00719'
YBR012W-A'	PF01021'
YBR012W-B'	PF00665'
YBR012W-B'	PF01021'
YBR012W-B'	PF07727'
YBR014C'	PF00462'
YBR015C'	PF11051'
YBR019C'	PF01263'
YBR019C'	PF01370'
YBR020W'	PF00288'
YBR020W'	PF08544'
YBR020W'	PF10509'
YBR021W'	PF02133'
YBR024W'	PF02630'
YBR025C'	PF01926'
YBR025C'	PF06071'
YBR028C'	PF00069'
YBR028C'	PF00433'
YBR029C'	PF01148'
YBR030W'	PF00856'
YBR031W'	PF00573'
YBR031W'	PF14374'
YBR033W'	PF00172'
YBR034C'	PF13847'
YBR035C'	PF01243'
YBR037C'	PF02630'
YBR038W'	PF01644'
YBR038W'	PF08407'
YBR041W'	PF00501'
YBR042C'	PF01553'
YBR043C'	PF07690'
YBR044C'	PF00118'
YBR046C'	PF00107'
YBR046C'	PF08240'
YBR048W'	PF00366'
YBR049C'	PF13921'
YBR050C'	PF08550'
YBR054W'	PF01036'
YBR058C'	PF00443'
YBR058C'	PF00627'
YBR058C'	PF02148'
YBR059C'	PF00069'
YBR061C'	PF01728'
YBR062C'	PF13639'
YBR066C'	PF13465'
YBR067C'	PF00660'
YBR068C'	PF00324'
YBR069C'	PF00324'
YBR072W'	PF00011'
YBR073W'	PF00176'
YBR073W'	PF00271'
YBR073W'	PF10382'
YBR074W'	PF04389'
YBR080C'	PF00004'
YBR080C'	PF02359'
YBR080C'	PF02933'
YBR081C'	PF00439'
YBR082C'	PF00179'
YBR084C-A'	PF01280'
YBR084W'	PF00763'
YBR084W'	PF01268'
YBR084W'	PF02882'
YBR085W'	PF00153'
YBR087W'	PF08542'
YBR089C-A'	PF00505'
YBR091C'	PF02953'
YBR092C'	PF00328'
YBR093C'	PF00328'
YBR097W'	PF00069'
YBR102C'	PF08700'
YBR103W'	PF00400'
YBR103W'	PF08513'
YBR104W'	PF00153'
YBR105C'	PF09783'
YBR109C'	PF13499'
YBR110W'	PF00534'
YBR111C'	PF00293'
YBR112C'	PF00515'
YBR112C'	PF13414'
YBR114W'	PF00097'
YBR114W'	PF00176'
YBR114W'	PF00271'
YBR115C'	PF00501'
YBR115C'	PF00550'
YBR117C'	PF00456'
YBR117C'	PF02779'
YBR117C'	PF02780'
YBR118W'	PF00009'
YBR118W'	PF03143'
YBR118W'	PF03144'
YBR119W'	PF00076'
YBR119W'	PF14259'
YBR125C'	PF00481'
YBR126C'	PF00982'
YBR127C'	PF00006'
YBR127C'	PF00306'
YBR127C'	PF02874'
YBR129C'	PF00169'
YBR132C'	PF00324'
YBR136W'	PF00454'
YBR136W'	PF02259'
YBR136W'	PF02260'
YBR139W'	PF00450'
YBR140C'	PF00616'
YBR142W'	PF00270'
YBR142W'	PF00271'
YBR143C'	PF03463'
YBR143C'	PF03464'
YBR143C'	PF03465'
YBR145W'	PF00107'
YBR145W'	PF08240'
YBR146W'	PF00380'
YBR147W'	PF04193'
YBR149W'	PF00248'
YBR150C'	PF00172'
YBR150C'	PF04082'
YBR151W'	PF06999'
YBR155W'	PF00515'
YBR159W'	PF00106'
YBR160W'	PF00069'
YBR161W'	PF04488'
YBR162C'	PF10287'
YBR162C'	PF10290'
YBR164C'	PF00025'
YBR168W'	PF06398'
YBR169C'	PF00012'
YBR172C'	PF02213'
YBR175W'	PF00400'
YBR177C'	PF00561'
YBR179C'	PF00350'
YBR180W'	PF07690'
YBR181C'	PF01092'
YBR182C'	PF00319'
YBR183W'	PF05875'
YBR186W'	PF00004'
YBR189W'	PF00163'
YBR189W'	PF01479'
YBR191W'	PF01157'
YBR192W'	PF00153'
YBR195C'	PF00400'
YBR195C'	PF12265'
YBR198C'	PF00400'
YBR198C'	PF08513'
YBR199W'	PF01793'
YBR200W'	PF00018'
YBR200W'	PF00564'
YBR200W'	PF00787'
YBR201W'	PF04511'
YBR202W'	PF00493'
YBR204C'	PF00561'
YBR205W'	PF01793'
YBR207W'	PF03239'
YBR208C'	PF00289'
YBR208C'	PF00364'
YBR208C'	PF01425'
YBR208C'	PF02785'
YBR208C'	PF02786'
YBR210W'	PF03311'
YBR212W'	PF00076'
YBR214W'	PF00571'
YBR216C'	PF08568'
YBR218C'	PF00289'
YBR218C'	PF00364'
YBR218C'	PF00682'
YBR218C'	PF02436'
YBR218C'	PF02785'
YBR218C'	PF02786'
YBR219C'	PF13000'
YBR220C'	PF13000'
YBR221C'	PF02779'
YBR221C'	PF02780'
YBR222C'	PF00501'
YBR222C'	PF13193'
YBR227C'	PF07724'
YBR227C'	PF10431'
YBR233W'	PF00013'
YBR234C'	PF00400'
YBR235W'	PF00324'
YBR237W'	PF00270'
YBR237W'	PF00271'
YBR239C'	PF00172'
YBR240C'	PF00172'
YBR241C'	PF00083'
YBR242W'	PF01966'
YBR244W'	PF00255'
YBR245C'	PF00176'
YBR245C'	PF00271'
YBR245C'	PF09110'
YBR245C'	PF09111'
YBR248C'	PF00117'
YBR248C'	PF00977'
YBR249C'	PF00793'
YBR250W'	PF00339'
YBR251W'	PF00333'
YBR251W'	PF03719'
YBR254C'	PF04628'
YBR260C'	PF00611'
YBR260C'	PF00620'
YBR263W'	PF00464'
YBR264C'	PF00071'
YBR265W'	PF00106'
YBR267W'	PF12756'
YBR270C'	PF08539'
YBR271W'	PF10294'
YBR273C'	PF00789'
YBR274W'	PF00069'
YBR276C'	PF00782'
YBR280C'	PF13540'
YBR281C'	PF00400'
YBR281C'	PF01546'
YBR281C'	PF07687'
YBR283C'	PF00344'
YBR283C'	PF10559'
YBR284W'	PF00962'
YBR286W'	PF04389'
YBR287W'	PF03547'
YBR288C'	PF00928'
YBR289W'	PF04855'
YBR291C'	PF00153'
YBR293W'	PF07690'
YBR294W'	PF00916'
YBR294W'	PF01740'
YBR294W'	PF13792'
YBR295W'	PF00122'
YBR295W'	PF00702'
YBR297W'	PF00172'
YBR297W'	PF04082'
YBR298C'	PF00083'
YBR299W'	PF00128'
YBR301W'	PF00660'
YBR302C'	PF00674'
YCL001W-B'	PF03465'
YCL004W'	PF00614'
YCL011C'	PF00076'
YCL017C'	PF00266'
YCL018W'	PF00180'
YCL019W'	PF00665'
YCL019W'	PF01021'
YCL019W'	PF07727'
YCL019W'	PF13976'
YCL020W'	PF01021'
YCL024W'	PF00069'
YCL025C'	PF00324'
YCL026C-A'	PF00881'
YCL026C-B'	PF00881'
YCL027W'	PF00018'
YCL029C'	PF01302'
YCL032W'	PF00788'
YCL034W'	PF03127'
YCL035C'	PF00462'
YCL037C'	PF05383'
YCL039W'	PF00400'
YCL040W'	PF00349'
YCL040W'	PF03727'
YCL043C'	PF00085'
YCL043C'	PF13848'
YCL050C'	PF09830'
YCL054W'	PF01728'
YCL055W'	PF05063'
YCL057W'	PF01432'
YCL064C'	PF00291'
YCL066W'	PF04769'
YCL067C'	PF00046'
YCL069W'	PF07690'
YCL073C'	PF07690'
YCR002C'	PF00735'
YCR004C'	PF00258'
YCR005C'	PF00285'
YCR007C'	PF00674'
YCR008W'	PF00069'
YCR009C'	PF03114'
YCR010C'	PF01184'
YCR011C'	PF00005'
YCR011C'	PF01061'
YCR015C'	PF12710'
YCR017C'	PF03372'
YCR017C'	PF10277'
YCR018C'	PF00320'
YCR019W'	PF00294'
YCR020C'	PF03070'
YCR020C-A'	PF01423'
YCR021C'	PF01036'
YCR023C'	PF07690'
YCR024C'	PF00152'
YCR024C'	PF01336'
YCR024C-A'	PF08114'
YCR026C'	PF01663'
YCR027C'	PF00071'
YCR028C'	PF07690'
YCR031C'	PF00411'
YCR033W'	PF00249'
YCR034W'	PF01151'
YCR035C'	PF01138'
YCR036W'	PF00294'
YCR037C'	PF03105'
YCR038C'	PF00617'
YCR039C'	PF00046'
YCR040W'	PF04769'
YCR045C'	PF00082'
YCR045C'	PF05922'
YCR047C'	PF08241'
YCR048W'	PF03062'
YCR051W'	PF00023'
YCR053W'	PF00291'
YCR057C'	PF00400'
YCR057C'	PF04003'
YCR059C'	PF01205'
YCR059C'	PF05773'
YCR060W'	PF13414'
YCR061W'	PF10355'
YCR065W'	PF00250'
YCR066W'	PF00097'
YCR066W'	PF02037'
YCR067C'	PF00400'
YCR068W'	PF01764'
YCR069W'	PF00160'
YCR072C'	PF00400'
YCR072C'	PF08154'
YCR073C'	PF00069'
YCR073W-A'	PF01182'
YCR075C'	PF04193'
YCR075W-A'	PF11503'
YCR079W'	PF00481'
YCR083W'	PF00085'
YCR084C'	PF00400'
YCR088W'	PF00018'
YCR088W'	PF00241'
YCR089W'	PF13928'
YCR091W'	PF00069'
YCR092C'	PF00488'
YCR092C'	PF01624'
YCR092C'	PF05188'
YCR092C'	PF05190'
YCR092C'	PF05192'
YCR094W'	PF03381'
YCR095C'	PF03162'
YCR096C'	PF00046'
YCR097W'	PF00046'
YCR098C'	PF00083'
YCR102C'	PF00107'
YCR102W-A'	PF00674'
YCR104W'	PF00660'
YCR105W'	PF00107'
YCR105W'	PF08240'
YCR106W'	PF00172'
YCR107W'	PF00248'
YDL001W'	PF02582'
YDL002C'	PF00505'
YDL003W'	PF04825'
YDL006W'	PF00481'
YDL007W'	PF00004'
YDL008W'	PF12678'
YDL010W'	PF00462'
YDL012C'	PF12734'
YDL015C'	PF02544'
YDL017W'	PF00069'
YDL018C'	PF01105'
YDL019C'	PF00023'
YDL019C'	PF00169'
YDL019C'	PF01237'
YDL021W'	PF00300'
YDL022W'	PF01210'
YDL022W'	PF07479'
YDL024C'	PF00328'
YDL025C'	PF00069'
YDL028C'	PF00069'
YDL029W'	PF00022'
YDL030W'	PF12171'
YDL031W'	PF00270'
YDL031W'	PF00271'
YDL036C'	PF00849'
YDL037C'	PF10182'
YDL040C'	PF07719'
YDL042C'	PF02146'
YDL042C'	PF04574'
YDL043C'	PF12874'
YDL045C'	PF01507'
YDL045W-A'	PF06747'
YDL047W'	PF00149'
YDL049C'	PF05390'
YDL049C'	PF10342'
YDL051W'	PF00076'
YDL051W'	PF05383'
YDL052C'	PF01553'
YDL054C'	PF07690'
YDL055C'	PF00132'
YDL055C'	PF00483'
YDL056W'	PF00023'
YDL056W'	PF04383'
YDL057W'	PF12695'
YDL059C'	PF04098'
YDL060W'	PF04950'
YDL060W'	PF08142'
YDL061C'	PF00253'
YDL064W'	PF00179'
YDL066W'	PF00180'
YDL070W'	PF00439'
YDL072C'	PF05529'
YDL074C'	PF13923'
YDL075W'	PF01198'
YDL077C'	PF10367'
YDL078C'	PF00056'
YDL078C'	PF02866'
YDL079C'	PF00069'
YDL080C'	PF00205'
YDL080C'	PF02775'
YDL080C'	PF02776'
YDL081C'	PF00428'
YDL082W'	PF01294'
YDL083C'	PF00380'
YDL084W'	PF00270'
YDL084W'	PF00271'
YDL085W'	PF00070'
YDL085W'	PF07992'
YDL086W'	PF01738'
YDL088C'	PF05172'
YDL090C'	PF00432'
YDL091C'	PF00789'
YDL093W'	PF02366'
YDL093W'	PF02815'
YDL095W'	PF02366'
YDL095W'	PF02815'
YDL097C'	PF01399'
YDL098C'	PF12874'
YDL101C'	PF00069'
YDL101C'	PF00498'
YDL102W'	PF00136'
YDL102W'	PF03104'
YDL102W'	PF14260'
YDL103C'	PF01704'
YDL104C'	PF00814'
YDL106C'	PF00046'
YDL108W'	PF00069'
YDL109C'	PF05057'
YDL111C'	PF01138'
YDL112W'	PF00588'
YDL113C'	PF00787'
YDL114W'	PF00106'
YDL119C'	PF00153'
YDL122W'	PF00443'
YDL123W'	PF01679'
YDL124W'	PF00248'
YDL125C'	PF01230'
YDL126C'	PF00004'
YDL126C'	PF02359'
YDL126C'	PF02933'
YDL127W'	PF00134'
YDL128W'	PF01699'
YDL130W'	PF00428'
YDL130W-A'	PF04568'
YDL131W'	PF00682'
YDL132W'	PF00888'
YDL132W'	PF10557'
YDL133C-A'	PF05162'
YDL134C'	PF00149'
YDL136W'	PF00831'
YDL137W'	PF00025'
YDL138W'	PF00083'
YDL140C'	PF00623'
YDL140C'	PF04983'
YDL140C'	PF04997'
YDL140C'	PF04998'
YDL140C'	PF05000'
YDL141W'	PF03099'
YDL142C'	PF01066'
YDL143W'	PF00118'
YDL144C'	PF02558'
YDL144C'	PF08546'
YDL145C'	PF00400'
YDL145C'	PF04053'
YDL147W'	PF01399'
YDL153C'	PF04000'
YDL154W'	PF00488'
YDL154W'	PF05192'
YDL155W'	PF00134'
YDL155W'	PF02984'
YDL156W'	PF00400'
YDL159W'	PF00069'
YDL160C'	PF00270'
YDL160C'	PF00271'
YDL161W'	PF01417'
YDL164C'	PF01068'
YDL164C'	PF04675'
YDL165W'	PF04153'
YDL166C'	PF13238'
YDL168W'	PF00107'
YDL168W'	PF08240'
YDL170W'	PF00172'
YDL170W'	PF11951'
YDL171C'	PF00310'
YDL171C'	PF07992'
YDL174C'	PF01565'
YDL174C'	PF02913'
YDL175C'	PF00098'
YDL177C'	PF01205'
YDL178W'	PF01565'
YDL178W'	PF02913'
YDL179W'	PF00134'
YDL181W'	PF04568'
YDL182W'	PF00682'
YDL184C'	PF05162'
YDL185W'	PF00006'
YDL185W'	PF00306'
YDL185W'	PF02874'
YDL185W'	PF05203'
YDL185W'	PF05204'
YDL188C'	PF00149'
YDL189W'	PF01424'
YDL191W'	PF00831'
YDL192W'	PF00025'
YDL194W'	PF00083'
YDL195W'	PF00400'
YDL198C'	PF00153'
YDL199C'	PF00083'
YDL202W'	PF00466'
YDL203C'	PF08238'
YDL204W'	PF02453'
YDL206W'	PF01699'
YDL208W'	PF01248'
YDL209C'	PF00076'
YDL210W'	PF13520'
YDL214C'	PF00069'
YDL215C'	PF00208'
YDL216C'	PF01398'
YDL217C'	PF02466'
YDL218W'	PF01284'
YDL222C'	PF06687'
YDL224C'	PF00076'
YDL225W'	PF00735'
YDL226C'	PF01412'
YDL227C'	PF05203'
YDL227C'	PF05204'
YDL228C'	PF10712'
YDL229W'	PF00012'
YDL230W'	PF00102'
YDL231C'	PF13515'
YDL234C'	PF00566'
YDL236W'	PF00702'
YDL238C'	PF01979'
YDL239C'	PF11778'
YDL240W'	PF00412'
YDL240W'	PF00620'
YDL243C'	PF00248'
YDL244W'	PF09084'
YDL245C'	PF00083'
YDL246C'	PF00107'
YDL246C'	PF08240'
YDL247W'	PF00083'
YDL248W'	PF00674'
YDR001C'	PF01204'
YDR001C'	PF07492'
YDR002W'	PF00638'
YDR003W'	PF12273'
YDR004W'	PF08423'
YDR009W'	PF00288'
YDR009W'	PF08544'
YDR009W'	PF10509'
YDR011W'	PF00005'
YDR011W'	PF01061'
YDR011W'	PF06422'
YDR012W'	PF00573'
YDR012W'	PF14374'
YDR013W'	PF05916'
YDR017C'	PF03770'
YDR018C'	PF01553'
YDR020C'	PF00485'
YDR021W'	PF00270'
YDR021W'	PF00271'
YDR023W'	PF00587'
YDR025W'	PF00366'
YDR026C'	PF00249'
YDR028C'	PF08550'
YDR030C'	PF00400'
YDR031W'	PF06747'
YDR032C'	PF00258'
YDR033W'	PF01036'
YDR034C'	PF00172'
YDR034C'	PF11951'
YDR034C-C'	PF01021'
YDR034C-D'	PF00665'
YDR034C-D'	PF01021'
YDR034C-D'	PF07727'
YDR034C-D'	PF13976'
YDR034W-B'	PF12734'
YDR035W'	PF00793'
YDR036C'	PF00378'
YDR037W'	PF00152'
YDR037W'	PF01336'
YDR038C'	PF00122'
YDR038C'	PF00689'
YDR038C'	PF00690'
YDR038C'	PF00702'
YDR039C'	PF00122'
YDR039C'	PF00689'
YDR039C'	PF00690'
YDR039C'	PF00702'
YDR040C'	PF00122'
YDR040C'	PF00689'
YDR040C'	PF00690'
YDR040C'	PF00702'
YDR041W'	PF00338'
YDR043C'	PF13465'
YDR045C'	PF01096'
YDR045C'	PF02150'
YDR046C'	PF00324'
YDR051C'	PF00300'
YDR054C'	PF00179'
YDR057W'	PF07915'
YDR058C'	PF07819'
YDR059C'	PF00179'
YDR060W'	PF03914'
YDR061W'	PF00005'
YDR062W'	PF00155'
YDR063W'	PF00241'
YDR064W'	PF00312'
YDR066C'	PF04181'
YDR067C'	PF03162'
YDR068W'	PF03909'
YDR069C'	PF00443'
YDR071C'	PF00583'
YDR072C'	PF01569'
YDR074W'	PF00982'
YDR074W'	PF02358'
YDR075W'	PF00149'
YDR080W'	PF00400'
YDR080W'	PF00637'
YDR090C'	PF04193'
YDR091C'	PF00005'
YDR091C'	PF04068'
YDR092W'	PF00179'
YDR093W'	PF00122'
YDR093W'	PF12710'
YDR096W'	PF02373'
YDR096W'	PF02375'
YDR096W'	PF13465'
YDR097C'	PF00488'
YDR097C'	PF01624'
YDR097C'	PF05188'
YDR097C'	PF05190'
YDR097C'	PF05192'
YDR098C'	PF00085'
YDR098C'	PF00462'
YDR098C-A'	PF01021'
YDR098C-B'	PF00665'
YDR098C-B'	PF01021'
YDR098C-B'	PF07727'
YDR099W'	PF00244'
YDR101C'	PF00557'
YDR106W'	PF00022'
YDR107C'	PF02990'
YDR109C'	PF00370'
YDR109C'	PF02782'
YDR111C'	PF00155'
YDR116C'	PF00687'
YDR117C'	PF01253'
YDR117C'	PF02201'
YDR119W'	PF07690'
YDR122W'	PF00069'
YDR122W'	PF02149'
YDR125C'	PF12697'
YDR126W'	PF01529'
YDR128W'	PF00400'
YDR129C'	PF00307'
YDR135C'	PF00005'
YDR135C'	PF00664'
YDR139C'	PF00240'
YDR142C'	PF00400'
YDR143C'	PF13639'
YDR144C'	PF00026'
YDR146C'	PF00096'
YDR147W'	PF01633'
YDR147W'	PF04428'
YDR148C'	PF00198'
YDR148C'	PF00364'
YDR151C'	PF00642'
YDR152W'	PF05773'
YDR153C'	PF01417'
YDR155C'	PF00160'
YDR158W'	PF01118'
YDR158W'	PF02774'
YDR159W'	PF03399'
YDR160W'	PF00324'
YDR162C'	PF00018'
YDR164C'	PF00995'
YDR165W'	PF00400'
YDR170C'	PF01369'
YDR170C'	PF12783'
YDR170W-A'	PF01021'
YDR171W'	PF00011'
YDR172W'	PF00009'
YDR172W'	PF03143'
YDR172W'	PF03144'
YDR173C'	PF03770'
YDR174W'	PF00505'
YDR177W'	PF00179'
YDR178W'	PF05328'
YDR179W-A'	PF02194'
YDR182W'	PF00149'
YDR182W-A'	PF13593'
YDR185C'	PF04707'
YDR188W'	PF00118'
YDR189W'	PF00995'
YDR190C'	PF06068'
YDR191W'	PF02146'
YDR194C'	PF00270'
YDR194C'	PF00271'
YDR197W'	PF08546'
YDR200C'	PF00498'
YDR205W'	PF01545'
YDR206W'	PF10373'
YDR206W'	PF10374'
YDR207C'	PF00172'
YDR208W'	PF01504'
YDR210C-C'	PF01021'
YDR210C-D'	PF00665'
YDR210C-D'	PF01021'
YDR210C-D'	PF07727'
YDR210W'	PF12734'
YDR210W-A'	PF01021'
YDR210W-B'	PF00665'
YDR210W-B'	PF01021'
YDR210W-B'	PF07727'
YDR210W-B'	PF13976'
YDR211W'	PF00132'
YDR211W'	PF00483'
YDR211W'	PF02020'
YDR212W'	PF00118'
YDR213W'	PF00172'
YDR213W'	PF11951'
YDR214W'	PF09229'
YDR216W'	PF00096'
YDR217C'	PF00533'
YDR218C'	PF00735'
YDR219C'	PF00646'
YDR221W'	PF07915'
YDR222W'	PF08622'
YDR223W'	PF10380'
YDR224C'	PF00125'
YDR225W'	PF00125'
YDR226W'	PF00406'
YDR226W'	PF05191'
YDR232W'	PF00155'
YDR233C'	PF02453'
YDR234W'	PF00330'
YDR234W'	PF00694'
YDR237W'	PF00281'
YDR237W'	PF00673'
YDR238C'	PF01602'
YDR242W'	PF01425'
YDR243C'	PF00270'
YDR243C'	PF00271'
YDR244W'	PF00515'
YDR244W'	PF13181'
YDR245W'	PF05637'
YDR246W'	PF04099'
YDR247W'	PF00069'
YDR248C'	PF13238'
YDR251W'	PF08546'
YDR252W'	PF01849'
YDR253C'	PF00096'
YDR253C'	PF13894'
YDR255C'	PF10607'
YDR255C'	PF13445'
YDR256C'	PF00199'
YDR256C'	PF06628'
YDR257C'	PF00856'
YDR258C'	PF00004'
YDR258C'	PF07724'
YDR258C'	PF10431'
YDR259C'	PF00170'
YDR261C'	PF00150'
YDR261C-C'	PF01021'
YDR261C-D'	PF00665'
YDR261C-D'	PF01021'
YDR261C-D'	PF07727'
YDR261W-A'	PF01021'
YDR261W-B'	PF00665'
YDR261W-B'	PF01021'
YDR261W-B'	PF07727'
YDR261W-B'	PF13976'
YDR263C'	PF00752'
YDR263C'	PF00867'
YDR264C'	PF00023'
YDR264C'	PF01529'
YDR265W'	PF04757'
YDR265W'	PF13923'
YDR266C'	PF13920'
YDR267C'	PF00400'
YDR268W'	PF00579'
YDR270W'	PF00122'
YDR270W'	PF00403'
YDR270W'	PF00702'
YDR272W'	PF00753'
YDR273W'	PF02845'
YDR276C'	PF01679'
YDR280W'	PF01138'
YDR280W'	PF03725'
YDR282C'	PF02582'
YDR283C'	PF00069'
YDR283C'	PF05773'
YDR284C'	PF01569'
YDR287W'	PF00459'
YDR291W'	PF00270'
YDR291W'	PF00271'
YDR292C'	PF00448'
YDR292C'	PF02881'
YDR293C'	PF00773'
YDR294C'	PF00282'
YDR295C'	PF11496'
YDR297W'	PF04116'
YDR300C'	PF00696'
YDR300C'	PF01472'
YDR301W'	PF03178'
YDR303C'	PF00172'
YDR304C'	PF00160'
YDR307W'	PF02366'
YDR307W'	PF02815'
YDR309C'	PF00786'
YDR311W'	PF03909'
YDR312W'	PF04427'
YDR313C'	PF01363'
YDR313C'	PF13639'
YDR314C'	PF10403'
YDR314C'	PF10404'
YDR314C'	PF10405'
YDR316W'	PF08242'
YDR316W-A'	PF01021'
YDR316W-B'	PF00665'
YDR316W-B'	PF01021'
YDR316W-B'	PF07727'
YDR319C'	PF10261'
YDR321W'	PF00710'
YDR322W'	PF01161'
YDR323C'	PF01363'
YDR324C'	PF00400'
YDR326C'	PF02893'
YDR328C'	PF03931'
YDR330W'	PF00789'
YDR332W'	PF00271'
YDR332W'	PF04851'
YDR334W'	PF00176'
YDR334W'	PF00271'
YDR334W'	PF07529'
YDR336W'	PF01926'
YDR337W'	PF00312'
YDR338C'	PF01554'
YDR339C'	PF04900'
YDR341C'	PF00750'
YDR341C'	PF03485'
YDR341C'	PF05746'
YDR342C'	PF00083'
YDR343C'	PF00083'
YDR345C'	PF00083'
YDR346C'	PF08622'
YDR348C'	PF08316'
YDR349C'	PF00026'
YDR352W'	PF04193'
YDR353W'	PF00070'
YDR353W'	PF07992'
YDR358W'	PF00790'
YDR358W'	PF02883'
YDR358W'	PF03127'
YDR359C'	PF07529'
YDR359C'	PF13921'
YDR364C'	PF00400'
YDR365C'	PF08159'
YDR365W-A'	PF01021'
YDR365W-B'	PF00665'
YDR365W-B'	PF01021'
YDR365W-B'	PF07727'
YDR368W'	PF00248'
YDR369C'	PF00498'
YDR370C'	PF08652'
YDR373W'	PF00036'
YDR375C'	PF00004'
YDR378C'	PF01423'
YDR379C-A'	PF05347'
YDR379W'	PF00412'
YDR379W'	PF00620'
YDR380W'	PF00205'
YDR380W'	PF02775'
YDR380W'	PF02776'
YDR381W'	PF00076'
YDR382W'	PF00428'
YDR384C'	PF01184'
YDR385W'	PF00009'
YDR385W'	PF00679'
YDR385W'	PF03144'
YDR385W'	PF03764'
YDR387C'	PF00083'
YDR388W'	PF00018'
YDR388W'	PF03114'
YDR389W'	PF00620'
YDR390C'	PF00899'
YDR390C'	PF02134'
YDR390C'	PF10585'
YDR392W'	PF02269'
YDR394W'	PF00004'
YDR395W'	PF03810'
YDR395W'	PF08506'
YDR397C'	PF00808'
YDR398W'	PF04003'
YDR399W'	PF00156'
YDR402C'	PF00067'
YDR404C'	PF00575'
YDR404C'	PF03876'
YDR405W'	PF00276'
YDR406W'	PF00005'
YDR406W'	PF01061'
YDR406W'	PF06422'
YDR408C'	PF00551'
YDR409W'	PF02037'
YDR409W'	PF02891'
YDR409W'	PF14324'
YDR411C'	PF04511'
YDR414C'	PF03124'
YDR415C'	PF04389'
YDR418W'	PF00298'
YDR418W'	PF03946'
YDR419W'	PF00817'
YDR419W'	PF11799'
YDR421W'	PF00172'
YDR422C'	PF04739'
YDR423C'	PF00170'
YDR423C'	PF08601'
YDR425W'	PF00787'
YDR427W'	PF01399'
YDR429C'	PF00076'
YDR430C'	PF00675'
YDR430C'	PF05193'
YDR432W'	PF00076'
YDR435C'	PF04072'
YDR436W'	PF00149'
YDR438W'	PF00892'
YDR441C'	PF00156'
YDR444W'	PF05057'
YDR447C'	PF00833'
YDR448W'	PF00249'
YDR448W'	PF00569'
YDR448W'	PF04433'
YDR450W'	PF00416'
YDR451C'	PF00046'
YDR452W'	PF00149'
YDR453C'	PF00578'
YDR453C'	PF10417'
YDR456W'	PF00999'
YDR457W'	PF00632'
YDR458C'	PF09402'
YDR458C'	PF12949'
YDR459C'	PF01529'
YDR463W'	PF00096'
YDR466W'	PF00069'
YDR468C'	PF05739'
YDR471W'	PF01777'
YDR472W'	PF04051'
YDR477W'	PF00069'
YDR478W'	PF04032'
YDR479C'	PF06398'
YDR483W'	PF01793'
YDR485C'	PF08265'
YDR486C'	PF03357'
YDR488C'	PF00400'
YDR489W'	PF05916'
YDR490C'	PF00069'
YDR492W'	PF03006'
YDR497C'	PF00083'
YDR500C'	PF01907'
YDR501W'	PF00498'
YDR502C'	PF00438'
YDR502C'	PF02772'
YDR502C'	PF02773'
YDR503C'	PF01569'
YDR505C'	PF04468'
YDR506C'	PF00394'
YDR506C'	PF07731'
YDR506C'	PF07732'
YDR507C'	PF00069'
YDR508C'	PF00324'
YDR510W'	PF00240'
YDR511W'	PF05347'
YDR513W'	PF00462'
YDR515W'	PF05383'
YDR516C'	PF00349'
YDR516C'	PF03727'
YDR518W'	PF00085'
YDR518W'	PF13848'
YDR519W'	PF00254'
YDR520C'	PF00172'
YDR523C'	PF00069'
YDR524C'	PF01412'
YDR525W-A'	PF01679'
YDR530C'	PF09830'
YDR533C'	PF01965'
YDR536W'	PF00083'
YDR538W'	PF02441'
YDR541C'	PF01370'
YDR542W'	PF00660'
YDR543C'	PF04318'
YDR545W'	PF00270'
YDR545W'	PF00271'
YEL003W'	PF01920'
YEL004W'	PF08449'
YEL006W'	PF00153'
YEL007W'	PF09729'
YEL009C'	PF00170'
YEL011W'	PF00128'
YEL012W'	PF00179'
YEL013W'	PF00514'
YEL015W'	PF03853'
YEL015W'	PF09532'
YEL016C'	PF01663'
YEL017C-A'	PF08114'
YEL019C'	PF11789'
YEL020C'	PF00205'
YEL020C'	PF02775'
YEL020C'	PF02776'
YEL020W-A'	PF02953'
YEL022W'	PF01369'
YEL022W'	PF12783'
YEL026W'	PF01248'
YEL027W'	PF00137'
YEL029C'	PF08543'
YEL030W'	PF00012'
YEL031W'	PF00122'
YEL031W'	PF12710'
YEL032W'	PF00493'
YEL034W'	PF00467'
YEL034W'	PF01287'
YEL036C'	PF03452'
YEL037C'	PF00240'
YEL037C'	PF00627'
YEL039C'	PF00034'
YEL040W'	PF00722'
YEL041W'	PF01513'
YEL042W'	PF01150'
YEL044W'	PF08265'
YEL047C'	PF00890'
YEL048C'	PF04628'
YEL049W'	PF00660'
YEL050C'	PF00181'
YEL050C'	PF03947'
YEL054C'	PF00298'
YEL054C'	PF03946'
YEL056W'	PF00400'
YEL056W'	PF12265'
YEL058W'	PF00408'
YEL058W'	PF02878'
YEL058W'	PF02879'
YEL060C'	PF00082'
YEL060C'	PF05922'
YEL061C'	PF00225'
YEL063C'	PF00324'
YEL064C'	PF01490'
YEL066W'	PF00583'
YEL069C'	PF00083'
YEL070W'	PF01232'
YEL070W'	PF08125'
YEL071W'	PF01565'
YEL071W'	PF02913'
YEL074W'	PF04318'
YEL077C'	PF00270'
YEL077C'	PF00271'
YER001W'	PF11051'
YER004W'	PF13460'
YER005W'	PF01150'
YER006W'	PF01926'
YER007C-A'	PF01472'
YER007W'	PF00560'
YER007W'	PF01302'
YER009W'	PF02136'
YER011W'	PF00399'
YER011W'	PF00660'
YER012W'	PF00227'
YER013W'	PF00271'
YER013W'	PF00575'
YER013W'	PF04408'
YER013W'	PF07717'
YER015W'	PF00501'
YER016W'	PF00307'
YER017C'	PF00004'
YER017C'	PF01434'
YER017C'	PF06480'
YER019C-A'	PF03911'
YER019W'	PF03372'
YER020W'	PF00503'
YER021W'	PF01399'
YER024W'	PF00755'
YER025W'	PF00009'
YER025W'	PF03144'
YER026C'	PF01066'
YER027C'	PF04739'
YER028C'	PF00096'
YER029C'	PF01423'
YER031C'	PF00071'
YER036C'	PF00005'
YER036C'	PF12848'
YER038C'	PF08691'
YER039C'	PF08449'
YER040W'	PF00320'
YER041W'	PF00867'
YER045C'	PF00170'
YER047C'	PF00004'
YER048C'	PF00226'
YER048C'	PF14308'
YER048W-A'	PF05347'
YER052C'	PF00696'
YER053C'	PF00153'
YER054C'	PF03370'
YER056C'	PF02133'
YER056C-A'	PF01199'
YER057C'	PF01042'
YER059W'	PF08613'
YER060W'	PF02133'
YER060W-A'	PF02133'
YER061C'	PF00109'
YER061C'	PF02801'
YER062C'	PF13419'
YER063W'	PF02037'
YER064C'	PF04001'
YER065C'	PF00463'
YER066W'	PF00400'
YER067W'	PF10843'
YER068W'	PF13893'
YER069W'	PF00696'
YER069W'	PF01118'
YER069W'	PF02774'
YER069W'	PF04768'
YER070W'	PF00317'
YER070W'	PF02867'
YER070W'	PF03477'
YER072W'	PF02656'
YER073W'	PF00171'
YER074W'	PF01282'
YER075C'	PF00102'
YER075C'	PF00581'
YER078C'	PF00557'
YER078C'	PF05195'
YER081W'	PF00389'
YER081W'	PF02826'
YER082C'	PF00400'
YER086W'	PF00291'
YER087C-B'	PF03911'
YER087W'	PF00587'
YER088C'	PF00249'
YER089C'	PF00481'
YER090W'	PF00425'
YER090W'	PF04715'
YER094C'	PF00227'
YER095W'	PF08423'
YER096W'	PF08238'
YER098W'	PF00443'
YER099C'	PF00156'
YER099C'	PF13793'
YER100W'	PF00179'
YER101C'	PF08240'
YER101C'	PF13602'
YER102W'	PF01201'
YER103W'	PF00012'
YER105C'	PF03177'
YER105C'	PF08801'
YER107C'	PF00400'
YER109C'	PF08513'
YER110C'	PF03810'
YER111C'	PF00023'
YER111C'	PF04383'
YER112W'	PF01423'
YER113C'	PF02990'
YER114C'	PF00018'
YER114C'	PF00169'
YER114C'	PF07647'
YER116C'	PF00097'
YER117W'	PF00238'
YER118C'	PF00018'
YER119C'	PF01490'
YER120W'	PF00635'
YER122C'	PF01412'
YER123W'	PF00069'
YER125W'	PF00168'
YER125W'	PF00397'
YER125W'	PF00632'
YER126C'	PF01201'
YER127W'	PF04000'
YER129W'	PF00069'
YER130C'	PF00096'
YER131W'	PF01283'
YER132C'	PF13964'
YER133W'	PF00149'
YER136W'	PF00996'
YER137C-A'	PF01021'
YER138C'	PF00665'
YER138C'	PF01021'
YER138C'	PF07727'
YER139C'	PF04181'
YER142C'	PF00730'
YER143W'	PF00627'
YER144C'	PF00443'
YER144C'	PF00581'
YER145C'	PF03239'
YER146W'	PF01423'
YER151C'	PF00443'
YER152C'	PF00155'
YER154W'	PF02096'
YER155C'	PF00617'
YER155C'	PF00618'
YER155C'	PF00620'
YER159C'	PF00808'
YER159C-A'	PF01021'
YER160C'	PF00665'
YER160C'	PF01021'
YER160C'	PF07727'
YER162C'	PF03835'
YER162C'	PF10403'
YER162C'	PF10404'
YER162C'	PF10405'
YER164W'	PF00176'
YER164W'	PF00271'
YER164W'	PF00385'
YER165W'	PF00076'
YER166W'	PF00122'
YER169W'	PF00096'
YER169W'	PF02373'
YER169W'	PF02375'
YER169W'	PF13894'
YER170W'	PF00406'
YER170W'	PF05191'
YER171W'	PF06733'
YER171W'	PF13307'
YER172C'	PF00270'
YER172C'	PF00271'
YER172C'	PF02889'
YER174C'	PF00085'
YER174C'	PF00462'
YER175C'	PF13847'
YER176W'	PF13086'
YER176W'	PF13087'
YER177W'	PF00244'
YER178W'	PF00676'
YER179W'	PF08423'
YER184C'	PF00172'
YER184C'	PF04082'
YER185W'	PF04479'
YER188C-A'	PF04318'
YER190W'	PF00270'
YER190W'	PF00271'
YFL001W'	PF01416'
YFL002C'	PF00270'
YFL002C'	PF00271'
YFL002C'	PF13959'
YFL002W-A'	PF00665'
YFL002W-A'	PF01021'
YFL002W-A'	PF07727'
YFL002W-A'	PF13976'
YFL002W-B'	PF01021'
YFL003C'	PF00488'
YFL003C'	PF05188'
YFL003C'	PF05190'
YFL003C'	PF05192'
YFL004W'	PF02656'
YFL004W'	PF03105'
YFL004W'	PF09359'
YFL005W'	PF00071'
YFL008W'	PF02463'
YFL008W'	PF06470'
YFL009W'	PF00400'
YFL009W'	PF00646'
YFL010C'	PF00397'
YFL011W'	PF00083'
YFL016C'	PF00226'
YFL016C'	PF00684'
YFL016C'	PF01556'
YFL017C'	PF00583'
YFL017W-A'	PF01423'
YFL018C'	PF00070'
YFL018C'	PF02852'
YFL018C'	PF07992'
YFL020C'	PF00660'
YFL021W'	PF00320'
YFL021W'	PF08550'
YFL022C'	PF01409'
YFL023W'	PF02996'
YFL024C'	PF10513'
YFL025C'	PF07819'
YFL027C'	PF00566'
YFL028C'	PF00005'
YFL029C'	PF00069'
YFL030W'	PF00266'
YFL031W'	PF07716'
YFL033C'	PF00069'
YFL033C'	PF00072'
YFL034C-A'	PF01776'
YFL034C-B'	PF03637'
YFL037W'	PF00091'
YFL037W'	PF03953'
YFL038C'	PF00071'
YFL039C'	PF00022'
YFL040W'	PF00083'
YFL041W'	PF00394'
YFL041W'	PF07731'
YFL041W'	PF07732'
YFL042C'	PF02893'
YFL044C'	PF02338'
YFL046W'	PF07798'
YFL047W'	PF00610'
YFL047W'	PF00611'
YFL047W'	PF00620'
YFL048C'	PF03388'
YFL049W'	PF08624'
YFL050C'	PF01544'
YFL051C'	PF07691'
YFL052W'	PF00172'
YFL052W'	PF04082'
YFL053W'	PF02733'
YFL053W'	PF02734'
YFL054C'	PF00230'
YFL055W'	PF00324'
YFL056C'	PF00248'
YFL057C'	PF00248'
YFL058W'	PF09084'
YFL059W'	PF01680'
YFL060C'	PF01174'
YFL061W'	PF01966'
YFL062W'	PF00674'
YFL063W'	PF04318'
YFL066C'	PF00270'
YFL066C'	PF00271'
YFR004W'	PF01398'
YFR004W'	PF13012'
YFR005C'	PF00443'
YFR005C'	PF02148'
YFR006W'	PF00557'
YFR006W'	PF05195'
YFR009W'	PF00005'
YFR009W'	PF12848'
YFR010W'	PF00443'
YFR012W'	PF06687'
YFR014C'	PF00069'
YFR015C'	PF05693'
YFR018C'	PF04389'
YFR019W'	PF00118'
YFR019W'	PF01363'
YFR019W'	PF01504'
YFR021W'	PF00400'
YFR022W'	PF00339'
YFR022W'	PF02752'
YFR023W'	PF00076'
YFR023W'	PF13893'
YFR024C-A'	PF00018'
YFR024C-A'	PF04366'
YFR028C'	PF00782'
YFR030W'	PF00175'
YFR030W'	PF00667'
YFR031C'	PF02463'
YFR031C'	PF06470'
YFR031C-A'	PF00181'
YFR031C-A'	PF03947'
YFR032C'	PF14259'
YFR034C'	PF00010'
YFR037C'	PF00249'
YFR037C'	PF00569'
YFR037C'	PF04433'
YFR038W'	PF00176'
YFR038W'	PF00271'
YFR040W'	PF04499'
YFR041C'	PF00226'
YFR044C'	PF01546'
YFR044C'	PF07687'
YFR045W'	PF00153'
YFR048W'	PF02582'
YFR050C'	PF00227'
YFR051C'	PF00928'
YFR051C'	PF01217'
YFR052W'	PF03399'
YFR053C'	PF00349'
YFR053C'	PF03727'
YFR055W'	PF01053'
YGL002W'	PF01105'
YGL003C'	PF00400'
YGL004C'	PF00400'
YGL006W'	PF00122'
YGL006W'	PF00689'
YGL006W'	PF00690'
YGL006W'	PF00702'
YGL008C'	PF00122'
YGL008C'	PF00690'
YGL008C'	PF00702'
YGL009C'	PF00330'
YGL009C'	PF00694'
YGL011C'	PF00227'
YGL011C'	PF10584'
YGL012W'	PF01222'
YGL013C'	PF00172'
YGL013C'	PF04082'
YGL014W'	PF00806'
YGL018C'	PF00226'
YGL019W'	PF01214'
YGL021W'	PF12330'
YGL023C'	PF01363'
YGL026C'	PF00291'
YGL030W'	PF01248'
YGL031C'	PF01246'
YGL035C'	PF13465'
YGL038C'	PF04488'
YGL039W'	PF01370'
YGL043W'	PF01096'
YGL043W'	PF07500'
YGL043W'	PF08711'
YGL044C'	PF00076'
YGL045W'	PF00339'
YGL045W'	PF02752'
YGL048C'	PF00004'
YGL049C'	PF02854'
YGL049C'	PF12152'
YGL051W'	PF00674'
YGL053W'	PF00674'
YGL054C'	PF03311'
YGL055W'	PF00173'
YGL056C'	PF00571'
YGL058W'	PF00179'
YGL059W'	PF10436'
YGL060W'	PF08568'
YGL062W'	PF00289'
YGL062W'	PF00364'
YGL062W'	PF00682'
YGL062W'	PF02436'
YGL062W'	PF02785'
YGL062W'	PF02786'
YGL063W'	PF01416'
YGL064C'	PF00270'
YGL064C'	PF00271'
YGL065C'	PF00534'
YGL067W'	PF00293'
YGL070C'	PF01096'
YGL070C'	PF02150'
YGL071W'	PF08731'
YGL073W'	PF00447'
YGL076C'	PF00327'
YGL076C'	PF08079'
YGL077C'	PF13520'
YGL078C'	PF00270'
YGL078C'	PF00271'
YGL080W'	PF03650'
YGL081W'	PF00498'
YGL082W'	PF04424'
YGL083W'	PF00069'
YGL084C'	PF03062'
YGL087C'	PF00179'
YGL089C'	PF04648'
YGL089C'	PF05436'
YGL090W'	PF09302'
YGL091C'	PF10609'
YGL092W'	PF04096'
YGL092W'	PF13634'
YGL094C'	PF00929'
YGL095C'	PF00995'
YGL096W'	PF05920'
YGL097W'	PF00415'
YGL097W'	PF13540'
YGL099W'	PF01926'
YGL100W'	PF00400'
YGL101W'	PF01966'
YGL103W'	PF00828'
YGL104C'	PF00083'
YGL110C'	PF02845'
YGL114W'	PF03169'
YGL115W'	PF00571'
YGL116W'	PF00400'
YGL119W'	PF03109'
YGL120C'	PF00270'
YGL120C'	PF00271'
YGL120C'	PF04408'
YGL120C'	PF07717'
YGL123W'	PF00333'
YGL123W'	PF03719'
YGL125W'	PF02219'
YGL126W'	PF10261'
YGL128C'	PF00226'
YGL131C'	PF00628'
YGL131C'	PF01426'
YGL131C'	PF13832'
YGL133W'	PF02791'
YGL133W'	PF10537'
YGL134W'	PF08613'
YGL135W'	PF00687'
YGL136C'	PF01728'
YGL137W'	PF00400'
YGL137W'	PF04053'
YGL139W'	PF06011'
YGL140C'	PF13515'
YGL141W'	PF00632'
YGL142C'	PF03901'
YGL143C'	PF00472'
YGL144C'	PF05057'
YGL146C'	PF01105'
YGL147C'	PF00347'
YGL150C'	PF00176'
YGL150C'	PF00271'
YGL154C'	PF01648'
YGL155W'	PF00432'
YGL157W'	PF01370'
YGL158W'	PF00069'
YGL160W'	PF01794'
YGL160W'	PF08022'
YGL160W'	PF08030'
YGL161C'	PF04893'
YGL163C'	PF00176'
YGL163C'	PF00271'
YGL166W'	PF00649'
YGL167C'	PF00122'
YGL167C'	PF00689'
YGL167C'	PF00690'
YGL167C'	PF00702'
YGL171W'	PF00270'
YGL171W'	PF00271'
YGL172W'	PF13634'
YGL173C'	PF03159'
YGL178W'	PF00806'
YGL179C'	PF00069'
YGL180W'	PF00069'
YGL181W'	PF00627'
YGL181W'	PF01412'
YGL184C'	PF01053'
YGL185C'	PF02826'
YGL186C'	PF02133'
YGL189C'	PF01283'
YGL190C'	PF00400'
YGL192W'	PF05063'
YGL194C'	PF00850'
YGL196W'	PF01168'
YGL197W'	PF13964'
YGL198W'	PF04893'
YGL200C'	PF01105'
YGL201C'	PF00493'
YGL202W'	PF00155'
YGL203C'	PF00450'
YGL206C'	PF00637'
YGL207W'	PF00557'
YGL207W'	PF08512'
YGL208W'	PF04739'
YGL209W'	PF13465'
YGL210W'	PF00071'
YGL212W'	PF00787'
YGL212W'	PF05739'
YGL213C'	PF00400'
YGL215W'	PF08613'
YGL216W'	PF00225'
YGL220W'	PF01722'
YGL225W'	PF08449'
YGL226W'	PF02936'
YGL227W'	PF00622'
YGL227W'	PF10607'
YGL229C'	PF04499'
YGL234W'	PF00586'
YGL234W'	PF02769'
YGL238W'	PF03810'
YGL238W'	PF08506'
YGL241W'	PF03810'
YGL242C'	PF00023'
YGL245W'	PF00749'
YGL245W'	PF03950'
YGL246C'	PF08652'
YGL247W'	PF10104'
YGL251C'	PF00270'
YGL251C'	PF00271'
YGL251C'	PF02889'
YGL253W'	PF00349'
YGL253W'	PF03727'
YGL254W'	PF00096'
YGL255W'	PF02535'
YGL257C'	PF11051'
YGL258W'	PF10339'
YGL258W-A'	PF00026'
YGL259W'	PF00026'
YGL261C'	PF00660'
YGL263W'	PF00674'
YGR003W'	PF00888'
YGR003W'	PF10557'
YGR004W'	PF06398'
YGR007W'	PF01467'
YGR008C'	PF04774'
YGR010W'	PF01467'
YGR012W'	PF00291'
YGR015C'	PF00561'
YGR019W'	PF00202'
YGR023W'	PF04478'
YGR027C'	PF03297'
YGR027W-A'	PF01021'
YGR027W-B'	PF00665'
YGR027W-B'	PF01021'
YGR027W-B'	PF07727'
YGR028W'	PF00004'
YGR029W'	PF04777'
YGR031W'	PF00561'
YGR032W'	PF02364'
YGR032W'	PF14288'
YGR034W'	PF00467'
YGR036C'	PF01569'
YGR038C-A'	PF01021'
YGR038C-B'	PF00665'
YGR038C-B'	PF01021'
YGR038C-B'	PF07727'
YGR038W'	PF04061'
YGR040W'	PF00069'
YGR042W'	PF10382'
YGR043C'	PF00923'
YGR044C'	PF13894'
YGR052W'	PF00069'
YGR054W'	PF08662'
YGR055W'	PF13520'
YGR056W'	PF00439'
YGR056W'	PF01426'
YGR059W'	PF00735'
YGR060W'	PF04116'
YGR061C'	PF00586'
YGR061C'	PF02769'
YGR062C'	PF02096'
YGR065C'	PF07690'
YGR066C'	PF09783'
YGR067C'	PF00096'
YGR067C'	PF13894'
YGR068C'	PF02752'
YGR070W'	PF00610'
YGR070W'	PF00621'
YGR070W'	PF00780'
YGR074W'	PF01423'
YGR078C'	PF02996'
YGR080W'	PF00241'
YGR083C'	PF01008'
YGR085C'	PF00281'
YGR085C'	PF00673'
YGR086C'	PF13805'
YGR087C'	PF00205'
YGR087C'	PF02775'
YGR087C'	PF02776'
YGR088W'	PF00199'
YGR088W'	PF06628'
YGR091W'	PF01798'
YGR091W'	PF08060'
YGR092W'	PF00069'
YGR092W'	PF00433'
YGR094W'	PF00133'
YGR094W'	PF08264'
YGR095C'	PF01138'
YGR095C'	PF03725'
YGR096W'	PF00153'
YGR097W'	PF00169'
YGR100W'	PF00566'
YGR100W'	PF02893'
YGR101W'	PF01694'
YGR103W'	PF00533'
YGR108W'	PF00134'
YGR108W'	PF02984'
YGR109C'	PF00134'
YGR109C'	PF02984'
YGR109W-A'	PF03732'
YGR110W'	PF00561'
YGR117C'	PF08513'
YGR118W'	PF00164'
YGR119C'	PF13634'
YGR121C'	PF00909'
YGR123C'	PF00149'
YGR123C'	PF00515'
YGR123C'	PF07719'
YGR124W'	PF00733'
YGR124W'	PF13537'
YGR125W'	PF00027'
YGR125W'	PF00916'
YGR125W'	PF01740'
YGR131W'	PF01284'
YGR132C'	PF01145'
YGR133W'	PF00179'
YGR135W'	PF00227'
YGR135W'	PF10584'
YGR136W'	PF00018'
YGR138C'	PF07690'
YGR140W'	PF12550'
YGR143W'	PF03935'
YGR145W'	PF08159'
YGR148C'	PF01246'
YGR152C'	PF00071'
YGR154C'	PF13409'
YGR154C'	PF13410'
YGR155W'	PF00291'
YGR155W'	PF00571'
YGR157W'	PF04191'
YGR158C'	PF01138'
YGR159C'	PF00076'
YGR161C-C'	PF01021'
YGR161C-D'	PF00665'
YGR161C-D'	PF01021'
YGR161C-D'	PF07727'
YGR161W-A'	PF01021'
YGR161W-B'	PF00665'
YGR161W-B'	PF01021'
YGR161W-B'	PF07727'
YGR161W-B'	PF13976'
YGR162W'	PF02854'
YGR162W'	PF12152'
YGR163W'	PF04670'
YGR169C'	PF00849'
YGR170W'	PF00168'
YGR170W'	PF02666'
YGR171C'	PF09334'
YGR172C'	PF04893'
YGR173W'	PF01926'
YGR173W'	PF02824'
YGR177C'	PF07247'
YGR180C'	PF00268'
YGR181W'	PF02953'
YGR184C'	PF02207'
YGR185C'	PF00579'
YGR188C'	PF00069'
YGR188C'	PF08171'
YGR188C'	PF08311'
YGR189C'	PF00722'
YGR191W'	PF00324'
YGR192C'	PF00044'
YGR192C'	PF02800'
YGR193C'	PF00364'
YGR194C'	PF00370'
YGR194C'	PF02782'
YGR195W'	PF01138'
YGR195W'	PF03725'
YGR197C'	PF12051'
YGR199W'	PF02366'
YGR199W'	PF02815'
YGR200C'	PF00400'
YGR201C'	PF00043'
YGR202C'	PF01467'
YGR203W'	PF00581'
YGR204W'	PF00763'
YGR204W'	PF01268'
YGR204W'	PF02882'
YGR207C'	PF01012'
YGR208W'	PF00702'
YGR209C'	PF00085'
YGR210C'	PF01926'
YGR212W'	PF07247'
YGR213C'	PF04479'
YGR214W'	PF00318'
YGR218W'	PF03810'
YGR218W'	PF08389'
YGR220C'	PF00297'
YGR221C'	PF08693'
YGR224W'	PF07690'
YGR225W'	PF00400'
YGR230W'	PF05032'
YGR231C'	PF01145'
YGR232W'	PF00023'
YGR233C'	PF00023'
YGR233C'	PF03105'
YGR234W'	PF00042'
YGR234W'	PF00175'
YGR234W'	PF00970'
YGR238C'	PF13418'
YGR238C'	PF13854'
YGR240C'	PF00365'
YGR241C'	PF07651'
YGR243W'	PF03650'
YGR244C'	PF00549'
YGR246C'	PF00382'
YGR246C'	PF08271'
YGR248W'	PF01182'
YGR249W'	PF00447'
YGR250C'	PF00076'
YGR250C'	PF14259'
YGR252W'	PF00439'
YGR252W'	PF00583'
YGR253C'	PF00227'
YGR253C'	PF10584'
YGR254W'	PF00113'
YGR254W'	PF03952'
YGR255C'	PF01494'
YGR256W'	PF00393'
YGR256W'	PF03446'
YGR257C'	PF00153'
YGR258C'	PF00752'
YGR258C'	PF00867'
YGR260W'	PF07690'
YGR261C'	PF01602'
YGR264C'	PF09334'
YGR270W'	PF00004'
YGR270W'	PF00439'
YGR271W'	PF00270'
YGR271W'	PF00271'
[truncated: 2,936 more rows]
